# Supplementary material
Source: PubMed Central journal article supplement (PMC10461432)
Supplement: NIHMS1926446-supplement-1.pdf [file NIHMS1926446-supplement-1.pdf]

**Supplemental Table 1.** Relative risks estimated from multivariable Cox proportional hazards regression of any incident heart failure, heart failure with preserved ejection fraction (HFpEF, LVEF≥40%), and heart failure with reduced ejection fraction (HFrEF, LVEF<40%), overall and by primary breast cancer treatment received.

|                                           | All Cases vs. Controls |                                 | Cases Receiving Chemotherapy vs. Controls <sup>b</sup> |                                 | Cases Receiving Left-sided Radiation vs. Controls <sup>b</sup> |                                 | Cases Receiving Endocrine Therapy vs. Controls <sup>b</sup> |                                 |
|-------------------------------------------|------------------------|---------------------------------|--------------------------------------------------------|---------------------------------|----------------------------------------------------------------|---------------------------------|-------------------------------------------------------------|---------------------------------|
|                                           | HR <sup>a</sup>        | 95% CI                          | HR <sup>a</sup>                                        | 95% CI                          | HR <sup>a</sup>                                                | 95% CI                          | HR <sup>a</sup>                                             | 95% CI                          |
| <b>Any Heart Failure</b>                  | Cases: n=272<br>1.31   | Controls: n=990<br>(1.14, 1.51) | Cases: n=101<br>2.12                                   | Controls: n=224<br>(1.63, 2.75) | Cases: n=93<br>1.45                                            | Controls: n=297<br>(1.13, 1.86) | Cases: n=146<br>1.19                                        | Controls: n=556<br>(0.98, 1.44) |
| <b>Preserved EF Heart Failure (HFpEF)</b> | Cases: n=203<br>1.24   | Controls: n=795<br>(1.05, 1.46) | Cases: n=58<br>1.67                                    | Controls: n=170<br>(1.21, 2.31) | Cases: n=67<br>1.32                                            | Controls: n=244<br>(0.99, 1.75) | Cases: n=111<br>1.12                                        | Controls: n=456<br>(0.90, 1.40) |
| <b>Reduced EF Heart Failure (HFrEF)</b>   | Cases: n=62<br>1.50    | Controls: n=195<br>(1.09, 2.06) | Cases: n=38<br>3.28                                    | Controls: n=54<br>(2.06, 5.23)  | Cases: n=25<br>2.16                                            | Controls: n=53<br>(1.27, 3.68)  | Cases: n=31<br>1.28                                         | Controls: n=100<br>(0.82, 2.01) |

<sup>a</sup> Adjusted for baseline BMI, menopausal status, smoking status, prior history of diabetes, dyslipidemia, hypertension, neighborhood median household income and education level, and prior history of CVD conditions (arrhythmia, cardiomyopathy/heart failure, myocarditis/pericarditis, stroke/TIA, valvular disease, venous thromboembolic disease, ischemic heart disease), and prior history of chronic kidney disease

<sup>b</sup> The treatment subgroups presented are not mutually exclusive (i.e., they can overlap).
